# Supplementary material for: Developmental exposure to non-dioxin-like polychlorinated biphenyls promotes sensory deficits and disrupts dopaminergic and GABAergic signaling in zebrafish
Source: Commun Biol. 2021 Sep 24;4:1129. doi: 10.1038/s42003-021-02626-9 (PMC8463681; doi:10.1038/s42003-021-02626-9)
Supplement: Supplementary file 4 — Supplementary Data 1 [file 42003_2021_2626_MOESM4_ESM.xlsx]

## Sheet: Figure2b
Latency in milliseconds
DMSO_43dB	PCB153_1000nM_43dB	PCB153_100nM_43dB	PCB153_30nM_43dB	PCB153_10nM_43dB	PCB138_1000nM_43dB	PCB118_1000nM_43dB	PCB52_1000nM_43dB	PCB126_1nM_43dB
2.75	75	8	48.5	77.3333	44.5	53.5	9.5	9.5
67.5	37	32	47.75	4.5	48	48	8.25	31
30	81	70.5	33	32	42.6667	2	15.3333	4
8.5	99	33	22	5	47	20.6667	75	7
8	68	52.5	70.75	43.5	44.5	41.3333	9	11.6667
8	65.75	81.25	105	25.3333	77.25	41.75	8	7
3.5	51	92.5	51.3333	38	57	66	49	9.5
5	76	37.5	26	42.75	1	31	12.5	12.3333
61.3333	71	67	55.25	9	77	33	25.3333	6.5
56.25	71	41.5	18	7.75	77	83.5	9.5	9
7.33333	80	70	75	8.75	41	23.5	64.5	7
11.25	42.3333	72	81.25	8.66667	59.25	8.33333	66.3333	11.75
8.5	56.6667	57	4	9.75	10	7	61.5	8.33333
9	40	70.3333	57	44	63.25	43.75	161	10.5
10.5	47.5	50.5	4.66667	4.66667	69.5	17	10.5	10.6667
8.33333	59	7.25	81.5	51.3333	79.5	69	32.3333	27
8.66667	73	52.5	51.25	37	85	62	8	6
9.66667	49.3333	82	115	8.5	66.5	7.5	15.3333	3.25
9.5	93.3333	38	45.25	7.75	35	40	32.5	68
7.25	53	81.75	41.5	28.5	69.5	48.25	12.3333	11.5
7.66667	66.6667	29	28	18.5	4.5	15.5	32	11
7.25	101.333	50	39.25	10	7.5	40.3333	6	23
34.5	66	65.5	40	84	17	14.75	7.75	4
9.66667	47.5	74.25	7.66667	55	55	8	34	56
9	36.6667	64.3333	51	47	58.6667	63.25	56	53.5
10.5	58.3333	4.33333	18.25	26.25	48	27.75	20.75	53
5	87.5	61	31.25	4.33333	116.5	88.5	10	9.25
22.6667	14	80	87	24.3333	34	46.5	9	4.33333
7	78	48.5	24.75	6.66667	83	158	83	9.75
6.66667	25.5	41	94.6667	9	2.33333	9	58	79
10.5	29	39	41.25	36	40.5	6	44	10
5.25	55	137.667	22	30.3333	46.3333	8.5	9	3
7.25	139	55	48.5	9	12	48.25	91	8.75
7.25	10	94.6667	48.75	5.33333	135	32.25	7	11.3333
33.3333	58.5	39.75	47.25	44	62	24.6667	132	27.5
21.5	108	68.6667	123.667	53	41.75	78.3333	38	24.6667
8	117.5	24	56.5	26.5	66.5	36.75	72.75	6.5
11	33.3333	84	15.25	9	87	3	52	7.66667
4	141	16	27.25	69	2.5	41.75	14.3333	9
10	40.25	63	33.6667	50	40	48	16.3333	5.5
11	129	62.5	183.333	8	12.25	76.5	53.3333	18
8.75	72.5	33	32	69	152	54	47.5	70.3333
8.25	32	7	26	7.25	53	42.5	48.5	14.5
6.5	113	74.6667	46	7.25	81	48.25	28.3333	22.3333
7.66667	49	17.25	62.6667	10.25	7.33333	35.3333	32.5	6.75
5	2	73	3	3.33333	1	21.5	106	14
10	16.6667	3	9.25	9	43	63	21	8
5.33333	30	80.5	68.5	14.25	71.5	72.5	29	6.33333
3.66667	10.25	34.5	2.66667	22	93.5	9	8	4.5
6.75	133.5	56	3.25	51.25	53.5	97.3333	39.3333	6.5
6.25	44	63	70	37	86	14.5	57	97
24.5	78.3333	47.5	63	4.5	3	48.25	62.5	69.6667
10	57	59.6667	15.5	3.75	4	57.3333	9	24.75
10.6667	29	7	138	25.25	17	34	71.6667	52.5
5	67.6667	46.5	121	7.75	17.3333	24.3333	36	3.5
6	90	34	22.75	3.25	10	9	10	39
6.33333	117.333	55	8.5	79	8	60.5	17	20.6667
32	96	52	46	10	5	45.75	80.5	13
34	70	49.6667	3	47.75	42	8.66667	21	28.5
10.3333	45.5	8.5	21.5	57.75	136	29.25	120	43
42.5	31	50.3333	41	55	104	39.75	9	13.5
10.3333	80	15	24.25	34.75	5	49.5	19	10.5
3.66667	86.5	64	185	31.6667	60	41.5	52.5	5.5
3.66667	46	8.5	99.6667	4	137	48.6667	46.25	10.5
7.33333	96	55.3333	46.5	40.3333	37.5	36.75	13	33.75
9.66667	21.5	50	49.25	3	76	79.3333	13.5	28.6667
8.5	44.75	73.5	5.66667	24.75	82	27.5	48	3.5
11.5	34	43.3333	24.25	41	86.5	69.25	30.5	25.3333
4	25	42	27.75	3.5		73	22	51.5
15	96.5	54	44	30		38.25	28.75	7.5
8	38	27	157	44		67	43.3333	9.5
28.75	51.5	89.25	53	41		36.75	7.5	27.5
11.6667	62	6.25	71	9		35.25	41	42.5
10.5	78	22	135	20		51	131	100.5
32	77	32.6667	92	10.3333		34.75	36	6.75
6.25	80.5	4	79.25	24		58.6667	9	8.66667
38	71	100.667	10	7		39.3333	59.3333	37.5
20.6667	29.5	63.75	47.25	18.5		38	37	12
14.6667	67	7.75	49.5	122.5		47	67.5	7.5
8.33333	59	73	62.3333	3.5		56.5	31.3333	9.75
22	102	53	61	10		41.5	10	8
8.5	68.3333	48.25	76	24.25		98	20	7
15.25	36.3333	58.3333	55.5	6.66667		40.25	22	49
42.75	44.6667	55	71	54		55.5	6	43.5
8	7	116.5	110	3.75		58.5	94	44
6	44	9	54	10.25		51.5	48.3333	5
9.75	122	37	54.75	6.75		70.25	69
9.5	59.6667	33.25	77.6667	8.25		50.6667	16.5
25.6667	81.3333	42.75	5.5	35		107	37.3333
9.33333	80	4.5	69.5	5.5		47.5	53.6667
36.25	92.6667	62.75	65.6667	9		59.6667	47
4.66667	35.3333	13	33.75	66		35.6667	51.5
10	32	55	14	3.5		46.5	67
6	147	36	50.6667	26		47	7.33333
17.25	107.5	87.25	22.6667	8		131	86.3333
9.33333	86	30	67	10.5		62	41.5
8.66667	119	54.6667	23.3333	115.5		32.5	24
8.5	167	39	51.6667	10		56.5
6.66667	131	21.5	24.6667	33		32.5
17.5	74	40.25	49.6667	7.5
5.5	110	18.5	47	6
7.66667	95.5	37.25	50	10.5
42.75	67	62.5	27	22.75
35	74.5	55.5	20.75	25.75
3.66667	45.5	54	71	3.66667
7.66667	57.5	42.6667	4	29
47.25	74	89	19	7.5
48.25	77	2.5	21.5	11.5
8.5	48	67	55	67
6.5	64	28	53	3.33333
6.25	58	32	68.75	155
3	88	23.3333	25.5	9.25
39	75	38.3333	28.75
43.5	63.25	20.25	20.25
8.5	77	6.25	17.5
9.33333		30.75	49.6667
11.5		39.6667	6
11.25		32.75
7		45
32.5		8.75
19.25		39
48.6667		123
4		43
8		62
8.75		51.5
30		52.25
18.75		173
8		60.5
10		71.5
40.25		87
70		57.6667
8.75		28
19.5		118
10		69.3333
9.75		58
6		91.75
2.5		55
43		137
43.25		34
9.5		9.5
15.5		67.75
33.5		41
41.75		55
92		10
35		26
9.5		105.5
10		68
9.33333		59.5
97.3333		8.75
6.25		29
5.75		81.5
48.25		9.5
7.5		4
15.25		51
7.33333		35
5.33333		55
51.3333		47
7.5		11
8.5		100
7		43.75
20		44.5
19.3333		40
68		17.5
4		49
45.6667		46.5
57		35.6667
48		10.5
34		65.6667
7.66667		36.25
22		27.75
2		44.25
45.6667		7
55.25		44.25
55.75		97.3333
35.25		102.667
5.75		26.3333
8.66667		79.25
26		3.33333
68		9.25
9		50
38		30
9		53.5
28.5		34.5
10.3333		106
37		20.3333
34.75		37
8		6.5
10		72.5
10		59.25
10		54
89		28.75
34		73
6		45.6667
32		50
9		77.25
8.25		42.6667
37.5		22.6667
4.75		48.6667
3.5		43.25
5.5		102.667
8		163.333
8.5		123.5
37.3333		8.66667
2.5		75.5
22.3333		44.25
43		86.6667
4		55.75
16.6667		90.25
37.6667		67
13.6667		59.6667
11		46.3333
2.5		79
51		80
2.66667		8.5
49.5		27.3333
6.66667		41.25
9.5		45.5
20.75		8.75
47		49.3333
3.66667		22
36.25		64
9		62
5.25		106
9.75		6.25
9.5		42.75
49		42.25
112
64.5
9
7
54
53
7.66667
25
9.75
9
3
9
10
29.3333
5.66667
32.75
9
70
22.5
62
48.6667
42
42.75
4
63.3333
2.5
83.25
6
18.75
40
25.5
8.66667
28
8.5
58.75
19.75
9.5
4.75
6
7.75
3.5
69.5
48.3333
6
8
14
26.3333
61.5
6.66667
13
8.33333
27
8.75
44
8
6
47.75
24.6667
47.3333
38
11.5
38
34.5
46.75
7
48.5
23.25
8
40.25
28.6667
8.75
36.3333
9.33333
48
7.33333
5.33333
9
10.5
3
80
60.5
13.3333
5.33333
31
35
7.66667
6.5
8.25
7
3.5
32.6667
36
60.75
16.25
18.3333
7.5
53.6667
7.5
28
2
42
26.5
3
19
44.5
2.5
8.5
24.5
7
28.6667
36.3333
11.5
4.33333
8.33333
10.5
8
29.5
5.25
8.66667
8.75
26.5
49.5
4
3
7.75
8
48
38
27.25
121
10.3333
7
36.5
14.25
8.5
5
33
8
46
21
10
5.5
45.5
5
24
6.33333
30.6667
18
4
37.5
11.5
75.5
5
7.66667
12
12
9.33333
6
25.3333
8.75
3
8.33333
8.33333
59
37
19.5
29.3333
7.66667
6.5
2.5
22.6667
7
11.6667
53
2.75
44.5
40
25.5
44
4.66667
20.6667
9.5
36.5
3
6
22.25
9.25
22.75
73
34.25
3.75
11
24.6667
11
3
9.66667
3
7.75
5
46
52
4.33333
37.5
3.5
9.66667
6.5
6.25
32
5.66667
7.5
3
18
10
42.6667
21.5
3
33
3.5
39
4.5
18
43.75

## Sheet: Figure2c
Exposure Group	Stimulus intensity (dB)	Short latency C-bend bias
		Mean	SD	N
DMSO	32	-0.31752	0.772201	411
DMSO	38	0.163978	0.808716	434
DMSO	41	0.385019	0.760035	445
DMSO	43	0.420015	0.769228	448
PCB126_1nM	32	-0.43122	0.837428	63
PCB126_1nM	38	0.21875	0.864031	80
PCB126_1nM	41	0.509804	0.726189	85
PCB126_1nM	43	0.51938	0.695184	86
PCB138_1000nM	32	-0.46094	0.797783	64
PCB138_1000nM	38	-0.56573	0.769704	71
PCB138_1000nM	41	-0.54167	0.787356	64
PCB138_1000nM	43	-0.43627	0.827607	68
PCB118_1000nM	32	-0.85125	0.35565	93
PCB118_1000nM	38	-0.6684	0.615822	96
PCB118_1000nM	41	-0.4868	0.709336	101
PCB118_1000nM	43	-0.48485	0.709944	99
PCB52_1000nM	32	-0.48851	0.66995	87
PCB52_1000nM	38	-0.23732	0.747905	92
PCB52_1000nM	41	-0.27451	0.764895	102
PCB52_1000nM	43	-0.19072	0.772798	97
PCB153_1000nM	32	-0.78388	0.476934	91
PCB153_1000nM	38	-0.7873	0.499196	105
PCB153_1000nM	41	-0.70796	0.574996	113
PCB153_1000nM	43	-0.77101	0.473705	115
PCB153_100nM	32	-0.77862	0.491275	198
PCB153_100nM	38	-0.72072	0.561306	222
PCB153_100nM	41	-0.57675	0.672755	228
PCB153_100nM	43	-0.50885	0.716418	226
PCB153_30nM	32	-0.84455	0.400421	104
PCB153_30nM	38	-0.48571	0.681374	105
PCB153_30nM	41	-0.26023	0.763291	114
PCB153_30nM	43	-0.34758	0.74103	117
PCB153_10nM	32	-0.71212	0.608806	99
PCB153_10nM	38	-0.05503	0.843187	106
PCB153_10nM	41	0.223214	0.821554	112
PCB153_10nM	43	0.25744	0.837643	112

## Sheet: Figure2d
Exposure Group	Stimulus intensity (dB)	Fraction responding (%)
		Mean	SD	N
DMSO	32	75.2407	1.55382	450
DMSO	38	91.3697	1.05655	449
DMSO	41	94.707	0.861449	455
DMSO	43	95.806	0.79618	457
PCB126_1nM	32	47.2222	4.1275	96
PCB126_1nM	38	74.7368	3.91495	95
PCB126_1nM	41	81.8262	3.49527	94
PCB126_1nM	43	86.8421	3.21258	95
PCB138_1000nM	32	29.3893	3.1366	131
PCB138_1000nM	38	36.9141	3.56878	128
PCB138_1000nM	41	35.3053	3.65924	131
PCB138_1000nM	43	36.4341	3.61085	129
PCB118_1000nM	32	62.3053	3.40239	107
PCB118_1000nM	38	76.3117	3.35254	108
PCB118_1000nM	41	84.9537	2.85556	108
PCB118_1000nM	43	85.7477	2.82563	107
PCB52_1000nM	32	52.2321	3.49598	112
PCB52_1000nM	38	58.9286	3.54631	112
PCB52_1000nM	41	65.625	3.26316	112
PCB52_1000nM	43	65.3274	3.37827	112
PCB153_1000nM	32	39.0566	3.15338	159
PCB153_1000nM	38	47.6708	3.34255	161
PCB153_1000nM	41	50.7114	3.24715	164
PCB153_1000nM	43	51.5424	3.18838	161
PCB153_100nM	32	51.8775	2.36433	253
PCB153_100nM	38	70.4545	2.23711	253
PCB153_100nM	41	76.6	2.09938	250
PCB153_100nM	43	77.0092	2.1577	253
PCB153_30nM	32	48.4649	3.25272	152
PCB153_30nM	38	54.7697	3.43388	152
PCB153_30nM	41	63.4658	3.44805	151
PCB153_30nM	43	64.0899	3.39812	152
PCB153_10nM	32	68.0059	3.24501	112
PCB153_10nM	38	83.9912	2.90393	114
PCB153_10nM	41	92.029	2.12039	115
PCB153_10nM	43	93.3908	2.04205	116

## Sheet: Figure3b
Exposure Group	Trial	Neuromast Volume (µm3)
DMSO	1	636.437
DMSO	1	411.061
DMSO	1	553.716
DMSO	1	766.538
DMSO	1	703.713
DMSO	1	465.776
DMSO	1	352.831
DMSO	1	397.242
DMSO	1	689.244
DMSO	1	840.477
DMSO	1	310.658
DMSO	1	644.911
DMSO	2	497.507
DMSO	2	573.967
DMSO	2	577.372
DMSO	2	424.862
DMSO	2	591.624
DMSO	2	573.957
DMSO	2	628.214
DMSO	2	532.296
DMSO	2	676.586
DMSO	2	770.945
DMSO	3	545.321
DMSO	3	497.115
DMSO	3	529.48
DMSO	3	691.042
DMSO	3	538.425
DMSO	3	592.406
DMSO	3	468.363
DMSO	3	596.91
PCB153_1000nM	1	922.266
PCB153_1000nM	1	961.454
PCB153_1000nM	1	1026.53
PCB153_1000nM	1	1309.63
PCB153_1000nM	1	872.083
PCB153_1000nM	1	1097.27
PCB153_1000nM	1	1018.44
PCB153_1000nM	1	761.94
PCB153_1000nM	1	842.115
PCB153_1000nM	1	942.692
PCB153_1000nM	2	1029.05
PCB153_1000nM	2	594.186
PCB153_1000nM	2	742.327
PCB153_1000nM	2	643.995
PCB153_1000nM	2	1308.44
PCB153_1000nM	2	712.818
PCB153_1000nM	2	800.165
PCB153_1000nM	2	735.344
PCB153_1000nM	2	951.404
PCB153_1000nM	2	802.896
PCB153_1000nM	3	754.593
PCB153_1000nM	3	542.195
PCB153_1000nM	3	728.762
PCB153_1000nM	3	732.848
PCB153_1000nM	3	698.481
PCB153_1000nM	3	734.889
PCB153_1000nM	3	805.03
PCB153_1000nM	3	754.225
PCB153_1000nM	3	778.75

## Sheet: Figure3c
Exposure Group	Trial	Hair cells per L3 neuromast
DMSO	1	18
DMSO	1	20
DMSO	1	15
DMSO	1	17
DMSO	1	18
DMSO	1	20
DMSO	1	16
DMSO	2	13
DMSO	2	17
DMSO	2	16
DMSO	2	14
DMSO	2	13
DMSO	2	10
DMSO	2	13
DMSO	2	11
DMSO	2	13
DMSO	3	13
DMSO	3	11
DMSO	3	10
DMSO	3	13
DMSO	3	14
DMSO	3	12
DMSO	3	12
DMSO	3	14
DMSO	3	10
DMSO	3	15
PCB153_1000nM	1	14
PCB153_1000nM	1	18
PCB153_1000nM	1	24
PCB153_1000nM	1	19
PCB153_1000nM	1	20
PCB153_1000nM	1	18
PCB153_1000nM	2	15
PCB153_1000nM	2	13
PCB153_1000nM	2	13
PCB153_1000nM	2	9
PCB153_1000nM	2	11
PCB153_1000nM	2	13
PCB153_1000nM	2	17
PCB153_1000nM	2	11
PCB153_1000nM	2	16
PCB153_1000nM	2	12
PCB153_1000nM	3	11
PCB153_1000nM	3	12
PCB153_1000nM	3	15
PCB153_1000nM	3	10
PCB153_1000nM	3	18
PCB153_1000nM	3	16
PCB153_1000nM	3	15
PCB153_1000nM	3	17

## Sheet: Figure3d
Exposure Group	Trial	FM1-43 intensity (CTCF)
DMSO	1	412744
DMSO	1	463518
DMSO	1	421488
DMSO	1	498491
DMSO	1	405205
DMSO	1	282683
DMSO	1	317976
DMSO	1	305555
DMSO	1	311071
DMSO	1	162066
DMSO	2	270502
DMSO	2	222537
DMSO	2	304082
DMSO	2	305619
DMSO	2	314006
DMSO	2	391257
DMSO	2	235259
DMSO	2	263498
DMSO	2	191533
DMSO	2	281469
DMSO	3	226850
DMSO	3	311801
DMSO	3	162828
DMSO	3	219899
DMSO	3	194687
DMSO	3	416846
DMSO	3	367721
DMSO	3	311854
DMSO	3	261265
DMSO	3	441402
DMSO	3	189576
DMSO	3	340211
PCB153_1000nM	1	415807
PCB153_1000nM	1	412316
PCB153_1000nM	1	352384
PCB153_1000nM	1	280977
PCB153_1000nM	1	335363
PCB153_1000nM	1	456419
PCB153_1000nM	1	559572
PCB153_1000nM	1	347709
PCB153_1000nM	1	377980
PCB153_1000nM	1	500112
PCB153_1000nM	2	184282
PCB153_1000nM	2	226616
PCB153_1000nM	2	181593
PCB153_1000nM	2	142052
PCB153_1000nM	2	280389
PCB153_1000nM	2	279935
PCB153_1000nM	2	200504
PCB153_1000nM	2	321054
PCB153_1000nM	3	370561
PCB153_1000nM	3	353320
PCB153_1000nM	3	242633
PCB153_1000nM	3	250252
PCB153_1000nM	3	334149
PCB153_1000nM	3	288227
PCB153_1000nM	3	324484
PCB153_1000nM	3	530013
PCB153_1000nM	3	431639
PCB153_1000nM	3	403298

## Sheet: Figure4c
Exposure Group	Latency in milliseconds
DMSO	3
DMSO	2
DMSO	2
DMSO	3
DMSO	1
DMSO	2
DMSO	3
DMSO	3.5
DMSO	1
DMSO	1
DMSO	3
DMSO	1
DMSO	1.5
DMSO	1
DMSO	1
DMSO	2
DMSO	3
DMSO	2
DMSO	2
DMSO	3
DMSO	1
DMSO	2
DMSO	1
DMSO	9
DMSO	1
DMSO	1
DMSO	3
DMSO	1
DMSO	2
DMSO	2
DMSO	3
DMSO	8
DMSO	3
DMSO	4
DMSO	1
DMSO	2
DMSO	2
DMSO	1
DMSO	2
DMSO	2
DMSO	1
DMSO	3
DMSO	3
DMSO	3
PCB153_1000nM	2
PCB153_1000nM	2
PCB153_1000nM	3
PCB153_1000nM	3
PCB153_1000nM	3
PCB153_1000nM	2.5
PCB153_1000nM	1.5
PCB153_1000nM	2
PCB153_1000nM	1
PCB153_1000nM	2
PCB153_1000nM	25
PCB153_1000nM	2
PCB153_1000nM	5
PCB153_1000nM	1
PCB153_1000nM	1
PCB153_1000nM	3
PCB153_1000nM	2
PCB153_1000nM	2
PCB153_1000nM	9.5
PCB153_1000nM	2.5
PCB153_1000nM	2
PCB153_1000nM	4
PCB153_1000nM	2
PCB153_1000nM	1
PCB153_1000nM	1
PCB153_1000nM	2
PCB153_1000nM	7.5
PCB153_1000nM	9.5
PCB153_1000nM	3
PCB153_1000nM	2
PCB153_1000nM	1
PCB153_1000nM	1
PCB153_1000nM	2.5
PCB153_1000nM	1
PCB153_1000nM	1
PCB153_1000nM	3
PCB153_1000nM	1
PCB153_1000nM	1.5
PCB153_1000nM	1
PCB153_1000nM	2
PCB153_1000nM	8
PCB153_1000nM	1
PCB153_1000nM	7
PCB153_1000nM	2.5
PCB153_1000nM	9

## Sheet: Figure4d
Exposure Group	Fraction responding (%)
DMSO	100
DMSO	100
DMSO	100
DMSO	85.7143
DMSO	100
DMSO	57.1429
DMSO	100
DMSO	100
DMSO	100
DMSO	100
DMSO	100
DMSO	100
DMSO	100
DMSO	100
DMSO	100
DMSO	100
DMSO	100
DMSO	100
DMSO	100
DMSO	100
DMSO	100
DMSO	100
DMSO	100
DMSO	100
DMSO	100
DMSO	100
DMSO	100
DMSO	100
DMSO	100
DMSO	100
DMSO	42.8571
DMSO	87.5
DMSO	100
DMSO	100
DMSO	100
DMSO	100
DMSO	100
DMSO	100
DMSO	100
DMSO	100
DMSO	100
DMSO	100
DMSO	100
DMSO	100
PCB153_1000nM	100
PCB153_1000nM	100
PCB153_1000nM	100
PCB153_1000nM	100
PCB153_1000nM	85.7143
PCB153_1000nM	50
PCB153_1000nM	100
PCB153_1000nM	100
PCB153_1000nM	100
PCB153_1000nM	100
PCB153_1000nM	71.4286
PCB153_1000nM	100
PCB153_1000nM	100
PCB153_1000nM	100
PCB153_1000nM	100
PCB153_1000nM	100
PCB153_1000nM	100
PCB153_1000nM	83.3333
PCB153_1000nM	85.7143
PCB153_1000nM	100
PCB153_1000nM	100
PCB153_1000nM	85.7143
PCB153_1000nM	100
PCB153_1000nM	100
PCB153_1000nM	100
PCB153_1000nM	100
PCB153_1000nM	85.7143
PCB153_1000nM	85.7143
PCB153_1000nM	100
PCB153_1000nM	100
PCB153_1000nM	100
PCB153_1000nM	100
PCB153_1000nM	100
PCB153_1000nM	100
PCB153_1000nM	100
PCB153_1000nM	85.7143
PCB153_1000nM	100
PCB153_1000nM	100
PCB153_1000nM	100
PCB153_1000nM	83.3333
PCB153_1000nM	100
PCB153_1000nM	100
PCB153_1000nM	57.1429
PCB153_1000nM	100
PCB153_1000nM	100

## Sheet: Figure4e
Exposure Group	C-bend angle (˚)
DMSO	72.1753
DMSO	101.307
DMSO	87.8756
DMSO	102.341
DMSO	115.912
DMSO	129.577
DMSO	72.4652
DMSO	15.1
DMSO	75.0912
DMSO	80.9475
DMSO	94.0673
DMSO	72.3993
DMSO	87.6118
DMSO	93.1633
DMSO	81.7651
DMSO	87.1544
DMSO	19.8692
DMSO	73.6651
DMSO	90.4006
DMSO	73.9753
DMSO	79.1209
DMSO	100.758
DMSO	117.596
DMSO	20.7984
DMSO	103.528
DMSO	119.956
DMSO	61.3634
DMSO	120.811
DMSO	68.5184
DMSO	86.5046
DMSO	75.0512
DMSO	60.5973
DMSO	65.688
DMSO	78.844
DMSO	87.3599
DMSO	110.069
DMSO	89.0231
DMSO	80.8982
DMSO	75.9869
DMSO	68.2877
DMSO	98.5197
DMSO	75.8089
DMSO	97.5737
DMSO	87.7794
PCB153_1000nM	121.656
PCB153_1000nM	119.274
PCB153_1000nM	132.656
PCB153_1000nM	81.3464
PCB153_1000nM	96.3271
PCB153_1000nM	132.131
PCB153_1000nM	95.5471
PCB153_1000nM	78.4841
PCB153_1000nM	82.0112
PCB153_1000nM	134.114
PCB153_1000nM	39.2034
PCB153_1000nM	98.878
PCB153_1000nM	75.5732
PCB153_1000nM	128.391
PCB153_1000nM	114.02
PCB153_1000nM	186.657
PCB153_1000nM	164.305
PCB153_1000nM	112.119
PCB153_1000nM	68.7765
PCB153_1000nM	111.912
PCB153_1000nM	94.5755
PCB153_1000nM	119.905
PCB153_1000nM	100.567
PCB153_1000nM	133.45
PCB153_1000nM	123.164
PCB153_1000nM	132.475
PCB153_1000nM	36.8846
PCB153_1000nM	21.1748
PCB153_1000nM	44.4819
PCB153_1000nM	119.47
PCB153_1000nM	117.715
PCB153_1000nM	90.51
PCB153_1000nM	14.7541
PCB153_1000nM	100.748
PCB153_1000nM	171.459
PCB153_1000nM	111.542
PCB153_1000nM	88.063
PCB153_1000nM	119.504
PCB153_1000nM	132.522
PCB153_1000nM	135.193
PCB153_1000nM	43.604
PCB153_1000nM	123.563
PCB153_1000nM	31.6167
PCB153_1000nM	113.79
PCB153_1000nM	67.9089

## Sheet: Figure5a
Exposure Group	Monoamine	Concentration Replicate 1	Concentration Replicate 2	Concentration Replicate 3	Concentration Replicate 4
DMSO	GABA	271.28	287.41	304.59	305.74
DMSO	Choline-Chloride	91.51	87.59	87.52	88.51
DMSO	L-Glutamine	2073.4	2735.87	2205.83	2211.84
DMSO	3-Methoxytyramine hydrochloride	0.88	0.93	0.98	1.01
DMSO	L-Valine	1174.05	1312.35	1499.14	1392.31
DMSO	3-Hydroxytyramine hydrochloride	0.29	0.23	0.17	0.16
DMSO	Acetylcholine-chloride	2.19	2.07	1.54	1.74
DMSO	Serotonin	0.97	1.04	0.92	0.95
DMSO	Acetylcholine-chloride	2.53	2.37	1.43	1.8
DMSO	Histamine	3.5	4.06	5.78	7.17
DMSO	L-Histidine	1287.59	1356.41	1732.14	1858.18
DMSO	Glycine	991.83	1130.27	800.48	734.61
DMSO	L-Glutamic acid	595.37	641.44	662.38	679.46
DMSO	L-Dopa	1.75	1.48	2.08	2.34
PCB153	GABA	473.01	427.06	415.12	434.5
PCB153	Choline-Chloride	111.87	103.93	114.9	109.26
PCB153	L-Glutamine	1346.97	1390.3	1233.77	1507.24
PCB153	3-Methoxytyramine hydrochloride	1.5	1.09	1.25	1.43
PCB153	L-Valine	1612.66	1549.99	1519.84	1593.33
PCB153	3-Hydroxytyramine hydrochloride	0.18	0.16	0.12	0.14
PCB153	Acetylcholine-chloride	2.72	1.84	2.24	2.54
PCB153	Serotonin	1.05	0.98	1.04	0.93
PCB153	Acetylcholine-chloride	2.68	1.98	2.29	2.58
PCB153	Histamine	7.19	5.87	5.1	6.14
PCB153	L-Histidine	1879.64	1548.79	1463.01	1723.84
PCB153	Glycine	793.54	867.7	963.46	838.93
PCB153	L-Glutamic acid	664.37	602.9	585.85	675.73
PCB153	L-Dopa	2.07	1.73	1.95	1.92

[truncated: 22 more sheets: Figure5b, Figure5c, Fig.S1, Fig.S2, Fig.S3a, Fig.S3b, Fig.S4a, Fig.S4b, Fig.S4c, Fig.S4d, Fig.S4e, Fig.S5a, Fig.S5b, Fig.S5c, Fig.S5d, Fig.S5e, Fig.S6, Fig.S7b, Fig.S7d, Fig.S10b …]
